# Supplementary material for: Tailored sulfonated carbons: unraveling enhanced catalytic dynamics for fructose dehydration under conventional and microwave heating
Source: Royal Society of Chemistry journal article supplement (doi:10.1039/d4su00007b), 2024-01-01
Supplement: d4su00007b1.pdf [file d4su00007b1.pdf]

# Tailored Sulfonated Carbons: Unraveling Enhanced Catalytic Dynamics for Fructose Dehydration under Conventional and Microwave Heating

*Gabrielle Mathias Reis,<sup>a</sup> Letícia Ferreira Lima Machado,<sup>a</sup> Renan Silva Nunes,<sup>a</sup>  
Dalmo Mandelli<sup>a</sup> and Wagner Alves Carvalho<sup>\*a</sup>*

<sup>1</sup> Center for Natural Sciences and Humanities, Federal University of ABC  
(UFABC), Av. Dos Estados, 5001, Santo André – SP, CEP 09210-580, Brazil

\* Corresponding author: Phone/fax: +55 (11) 4996-8386. E-mail address:

[wagner.carvalho@ufabc.edu.br](mailto:wagner.carvalho@ufabc.edu.br)

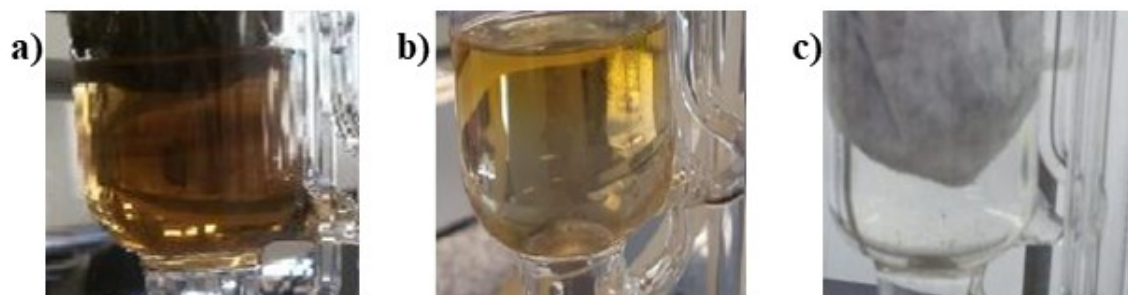

Figure S1: Appearance of the acetone used in the first washing of the SC prepared a) OL (3) 0.25h-180, b) OSE (1) 0.25h-120 and c) OSE (3) 6h-180.

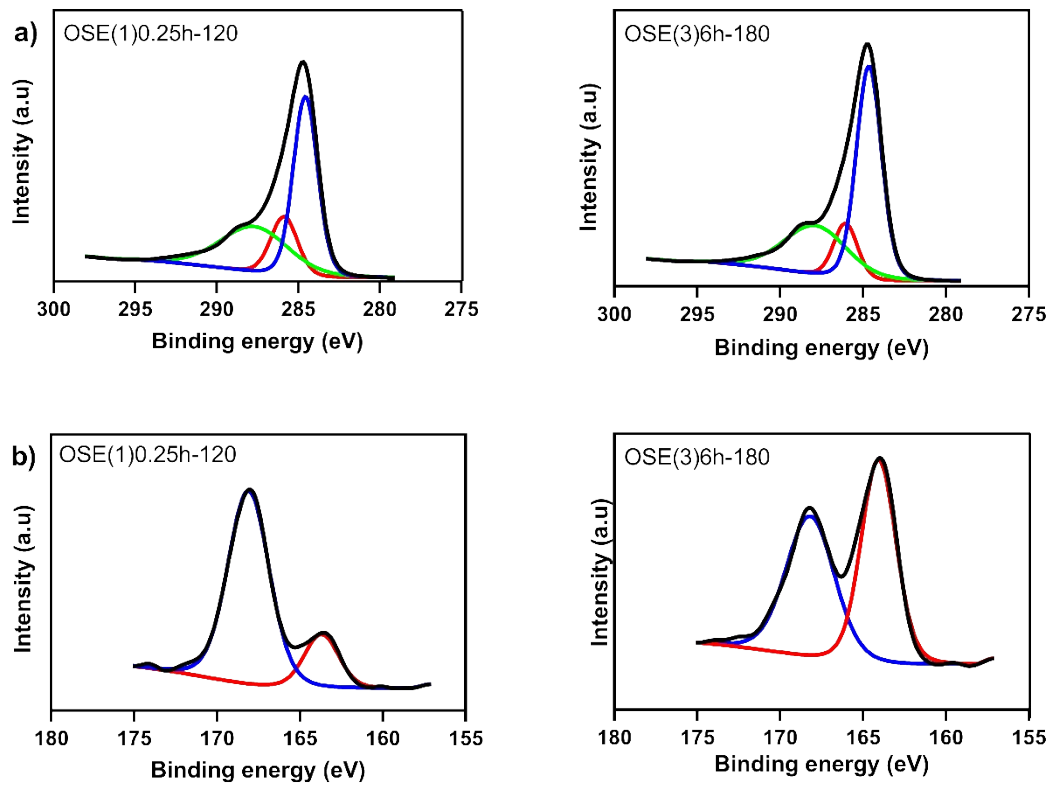

Figure S2: Deconvolution analysis of (a) C 1s and (b) S 2p peaks for OSE (1) 0.25h-120 and OSE (3) 6h-180.

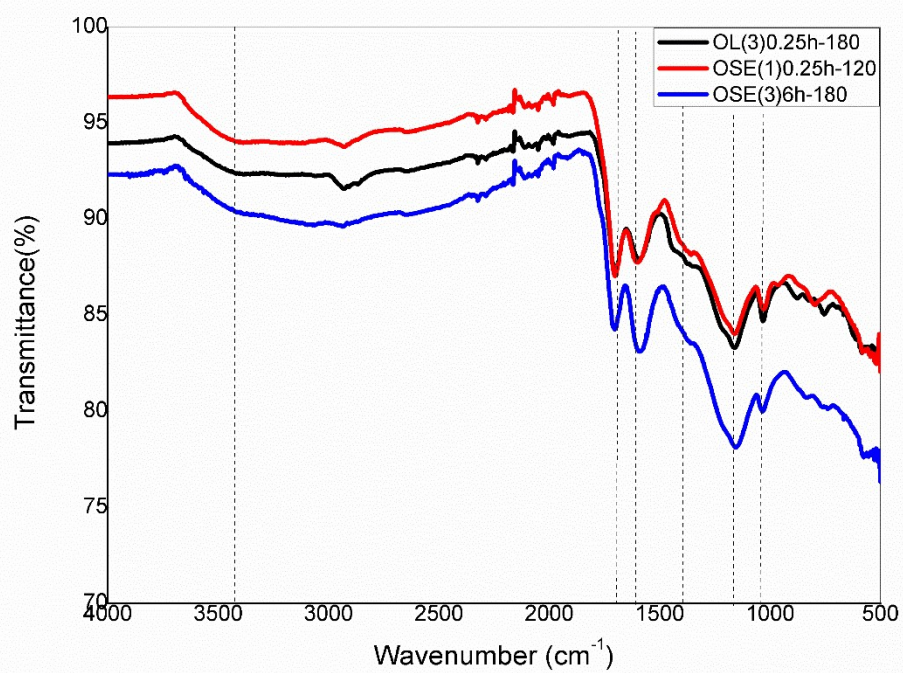

Figure S3: FTIR spectra of OL(3)0.25-180, OSE(1)0.25h-120 and OSE(3)6h-180 catalysts.

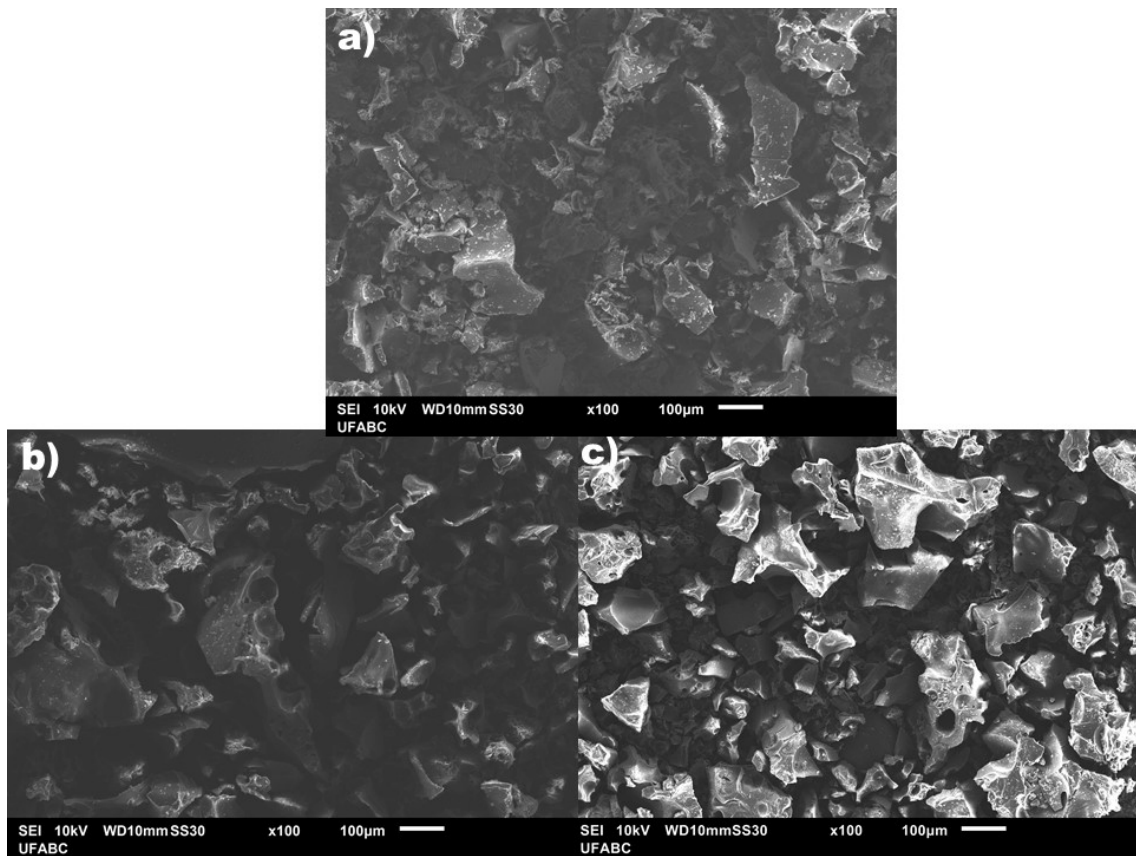

Figure S4: Micrograph of the SC: a) OL(3)0.25h-180, b) OSE(1)0.25h-120 and c) OSE(3)6h-180.

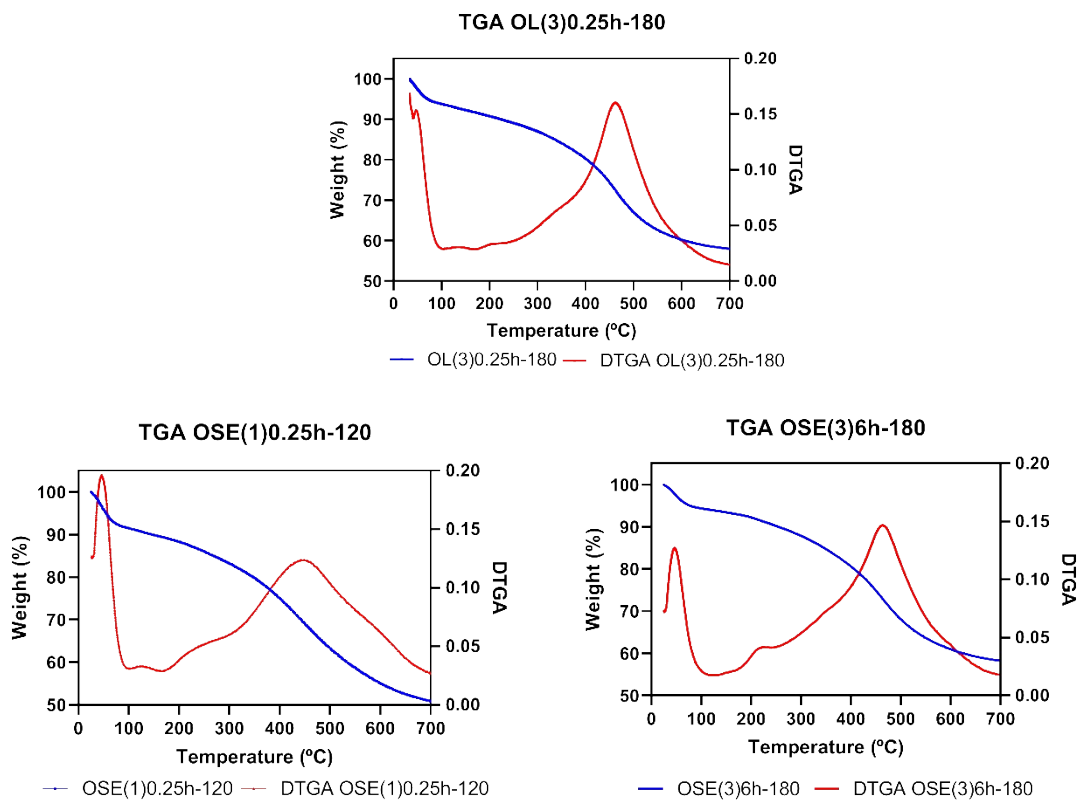

Figure S5: Thermogravimetric analysis of a) OL(3)0.25h-180, b) OSE(1)0.25h-120 and c) OSE(3)6h-180.
